# Supplementary material for: Stabilising pentavalent actinides—visible–near infrared and X-ray absorption spectroscopic studies of the utility of the [(Np3W4O15)(H2O)3(MW9O33)3]18−(M = Sb, Bi) structural type
Source: Royal Society of Chemistry journal article supplement (doi:10.1039/c1dt11742d), 2011-12-21

**E.S.I. 1.** Vis/nIR spectrum of 3 molar equivalents of  $\text{Na}_9[\alpha\text{-BiW}_9\text{O}_{33}] \cdot 16\text{H}_2\text{O}$  added to an acidic aqueous  $\{\text{NpO}_2\}^+$  stock with the pH raised to 7.09 prior to crystallization of  $(\text{NH}_4)_{14}\text{Na}_4[(\text{Np}_3\text{W}_4\text{O}_{15})(\text{H}_2\text{O})_{39}\text{BiW}_9\text{O}_{33}]_3 \cdot 62\text{H}_2\text{O}$ . The peak at 1023 nm is assigned to  $[(\text{Np}_3\text{W}_4\text{O}_{15})(\text{H}_2\text{O})_{39}\text{BiW}_9\text{O}_{33}]^{18-}$ , with the peak at 1001 nm attributed to a second  $\{\text{NpO}_2\}^+$  complex.

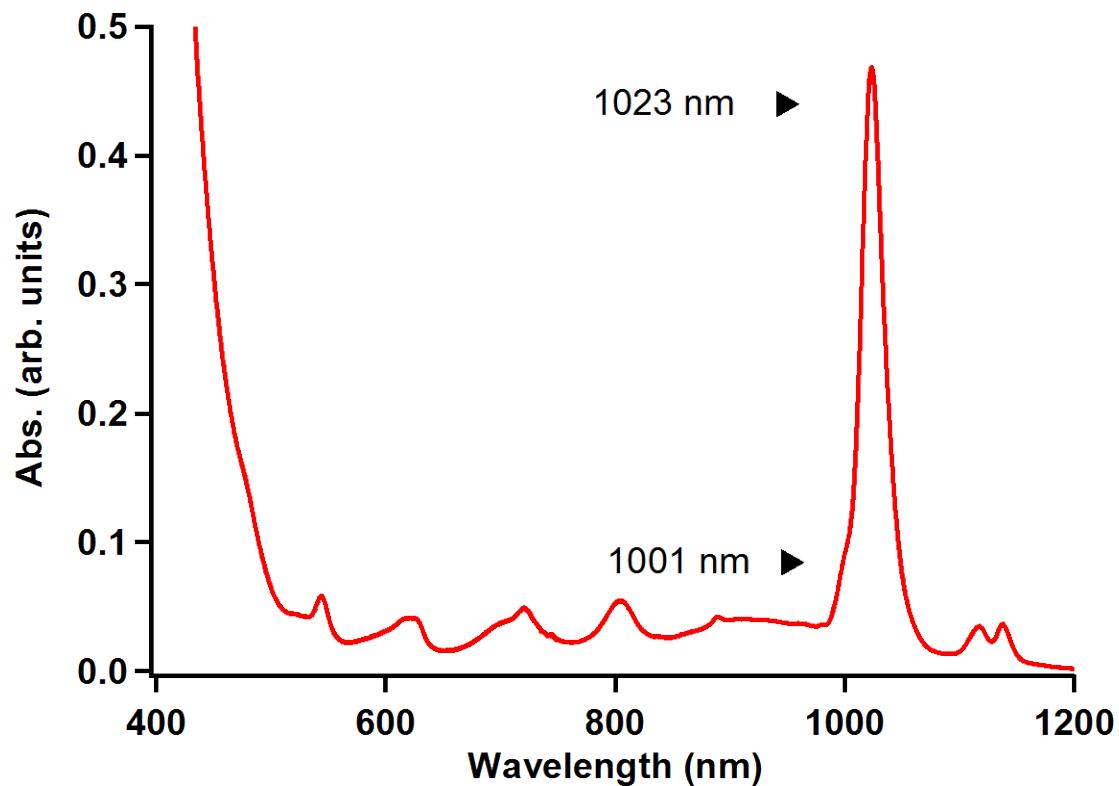

**E.S.I. 2.** Vis/nIR spectrum of 3 molar equivalents of  $\text{Na}_9[\alpha\text{-SbW}_9\text{O}_{33}] \cdot 20\text{H}_2\text{O}$  added to an acidic aqueous  $\{\text{NpO}_2\}^+$  stock with the pH raised to 7 (solution spectrum – left axis) prior to crystallization of  $(\text{NH}_4)_{14.5}\text{Na}_{3.5}[(\text{Np}_3\text{W}_4\text{O}_{15})(\text{H}_2\text{O})_{39}\text{SbW}_9\text{O}_{33}]_3 \cdot 40.5\text{H}_2\text{O}$  (solid state spectrum - right axis).

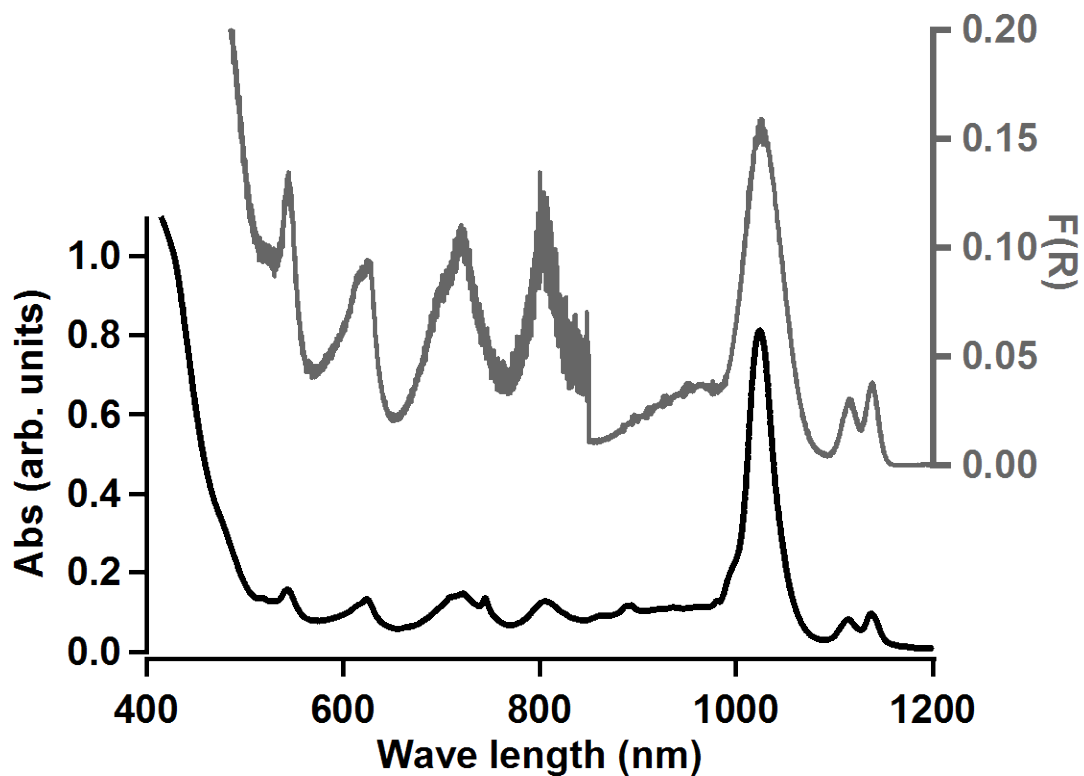

Supplement: c1dt11742d.pdf [file c1dt11742d.pdf]
